# Supplementary material for: The unstructured C-terminal extension of UvrD interacts with UvrB, but is dispensable for nucleotide excision repair
Source: PubMed Central journal article supplement (PMC2997466; doi:10.1016/j.dnarep.2009.08.005), 2009-11-02
Supplement: mmc1.pdf [file mmc1.pdf]

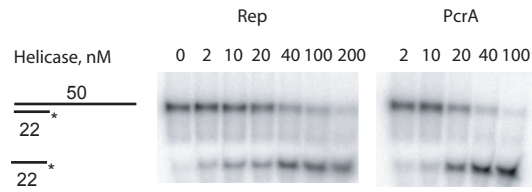

**Manelyte et al. Supplementary Figure 1**

Helicase activity of Rep and PcrA on a 3' single-strand tailed substrate under "low salt" conditions (50 mM KCl). The reactions were started by adding ATP to mixtures containing 2 nM labelled DNA substrate and the indicated concentrations of Rep and PcrA. Reactions were incubated for 10 min at 37°C then terminated and analysed as in Figure 4. The substrate contained a 5'  $\gamma$ -<sup>32</sup>P-labelled 22mer, and the label is indicated by an asterix.
